# Supplementary material
Source: publisher site journal article supplement (https://www.dovepress.com/article/267063)
Supplement: Supplementary file 1 [file get_supplementary_file.php]

1 **Supplemental Appendix**

2 This appendix has been provided by authors to give readers additional information  
3 about their work.

4 Supplement to: Sharma A, Alvarez PJ, Woods SD, et al. A Model to Predict Risk of  
5 Hyperkalemia in Patients With Chronic Kidney Disease Patients Using a Large  
6 Administrative Claims Database.

7 **Table of Contents**

8 **Appendix A** Identifying and stage-assigning individuals with chronic kidney disease  
9 (CKD) ..... **2**

10 **Appendix B** Renin-angiotensin-aldosterone system inhibitors (RAASi) and maximum  
11 labeled doses ..... **3**

12 **Appendix C** Non-RAASi medications associated with hyperkalemia (HK) ..... **4**

13 **Appendix D** Variables with significant univariate association to first identification of HK  
14 in the prediction year ..... **5**

15

16

17 **Appendix A . Table S1.** Identifying and stage-assigning individuals with chronic kidney disease  
18 (CKD)

19 Individuals in the study group were considered to have CKD if they had at least 1 claim  
20 with an International Classification of Diseases (ICD), 9<sup>th</sup> or 10<sup>th</sup> Revision, Clinical  
21 Modification (CM; ICD-9-CM or ICD-10-CM); or a lab report containing a value for  
22 estimated glomerular filtration rate (eGFR) by the Modification of Diet in Renal Disease  
23 Study equation.<sup>1</sup> CKD stage was assigned by ICD-9-CM or ICD-10-CM code or by the  
24 eGFR according to the following scheme. An individual was assigned their highest CKD  
25 stage found in the baseline year (BY).

| Stage                      | ICD-9-CM | ICD-10-CM | eGFR,<br>mL/min/1.73 m <sup>2</sup> |
|----------------------------|----------|-----------|-------------------------------------|
| CKD stage 1                | N18.1    | 585.1     | ≥90                                 |
| CKD stage 2                | N18.2    | 585.2     | 60–89                               |
| CKD stage 3                | N18.3    | 585.3     | 30–59                               |
| CKD stage 4                | N18.4    | 585.4     | 15–29                               |
| CKD stage 5                | N18.5    | 585.5     | <15                                 |
| End-stage renal<br>disease | N18.6    | 585.6     |                                     |

26 **Notes:** eGFR data from Stevens et al.<sup>1</sup> Copyright © 2007 National Kidney Foundation, Inc. Published by  
27 Elsevier Inc. All rights reserved.

28 **Reference 1.**

28 Stevens LA, Manzi J, Levey AS, et al. Impact of creatinine calibration on  
29 performance of GFR estimating equations in a pooled individual patient database.  
30 Am J Kidney Dis. 2007;50(1):21–35. Copyright © 2007 National Kidney  
Foundation, Inc. Published by Elsevier Inc. All rights reserved.

31 **Appendix B. Table S2.** Renin- aldosterone system inhibitors (RAASi's) and maximum  
 32 angiotensin-labeled doses

| <b>Angiotensin converting enzyme inhibitors (ACEi's)</b>           |                                          |
|--------------------------------------------------------------------|------------------------------------------|
| Benazepril 80 mg                                                   | Moexipril 30 mg                          |
| Captopril 450 mg                                                   | Perindopril 8 mg                         |
| Enalapril 40 mg                                                    | Quinapril 80 mg                          |
| Fosinopril 40 mg                                                   | Ramipril 10 mg                           |
| Lisinopril 40 mg                                                   | Trandolapril 8 mg                        |
| <b>Angiotensin II receptor blockers (ARBs)</b>                     |                                          |
| Azilsartan 80 mg                                                   | Losartan 100 mg                          |
| Candesartan 32 mg                                                  | Olmesartan 40 mg                         |
| Eprosartan 800 mg                                                  | Telmisartan 80 mg                        |
| Irbesartan 300 mg                                                  | Valsartan 320 mg                         |
| <b>Mineralocorticoid receptor antagonists (MRAs)</b>               |                                          |
| Eplerenone 100 mg                                                  | Spirolactone 200 mg                      |
| <b>Direct renin inhibitors (DRIs)</b>                              |                                          |
| Aliskiren 300 mg                                                   | Aliskiren-hydrochlorothiazide            |
| Aliskiren-valsartan (considered submaximum if taken as 150/160 mg) | Aliskiren-amlodipine-hydrochlorothiazide |
| Aliskiren-amlodipine                                               |                                          |

33

34 **Appendix C. Table S3.** Non-RAASi medications associated with hyperkalemia (HK)

|                                                      |
|------------------------------------------------------|
| <b>Nonsteroidal anti-inflammatory drugs (NSAIDs)</b> |
| <b>Beta-blockers</b>                                 |
| <b>Calcineurin inhibitors</b>                        |
| Cyclosporine                                         |
| Tacrolimus                                           |
| <b>Potassium-sparing diuretics</b>                   |
| Amiloride                                            |
| Triamterene                                          |

35

36 **Appendix D. Table S4.** Variables with significant univariate association to first identification of HK  
 37 in the prediction year

|                                                  |                                      |                                        |
|--------------------------------------------------|--------------------------------------|----------------------------------------|
| ACEi use                                         | Diabetes mellitus                    | MRA use                                |
| Age                                              | Gender                               | Nonspecific gastritis/dyspepsia        |
| Allergy                                          | Glaucoma                             | Number of comorbid conditions          |
| Anxiety                                          | Hepatitis                            | Obesity                                |
| ARB                                              | Human immunodeficiency virus disease | Osteoarthritis                         |
| Asthma                                           | Hyperlipidemia                       | Osteoporosis                           |
| Atrial fibrillation                              | Hypertension                         | Proportion of days covered $\geq 80\%$ |
| Beta-blocker use                                 | Inflammatory bowel disease           | Peripheral artery disease              |
| Business line (commercial vs Medicare Advantage) | Inpatient admission                  | Potassium-sparing diuretics use        |
| Calcineurin inhibitor use                        | Iron deficiency anemia               | Primary care visit                     |
| Cerebrovascular disease                          | Ischemic heart disease               | RAASi at optimal dose                  |
| Congestive heart failure                         | Kidney stone history                 | Geographic region                      |
| CKD stage                                        | Hemoglobin (lab)                     | Rheumatoid arthritis                   |
| Chronic thyroid disorders                        | Serum/plasma potassium (lab)         | Sacubitril-valsartan use               |
| Congenital heart disease                         | Liver disease                        | Visit to a medical specialist          |
| Chronic obstructive pulmonary disease            | Malignant neoplasms                  | Urban vs rural                         |
| Dementia                                         | Metabolic syndrome                   |                                        |
| Depression                                       | Migraine                             |                                        |

38
